# Supplementary material for: A mixed-ion strategy to construct CNT-decorated Co/N-doped hollow carbon for enhanced oxygen reduction
Source: Royal Society of Chemistry journal article supplement (doi:10.1039/c8cc05959d), 2018-01-01
Supplement: c8cc05959d1.pdf [file c8cc05959d1.pdf]

## Supporting Information

### Mixed-ion strategy to construct CNTs-decorated Co/N-doped hollow carbon for enhanced oxygen reduction

Taotao Feng<sup>a</sup> and Meining Zhang<sup>\*a</sup>

Department of Chemistry, Renmin University of China, Beijing 100872, P. R. China

\*E-mail: [mnzhang@ruc.edu.cn](mailto:mnzhang@ruc.edu.cn)

#### Experimental

**Reagent and solution.** Tetraethyl silicate (TEOS, 28.4%), Methanol (CH<sub>3</sub>OH), Cobaltous sulfate heptahydrate (CoSO<sub>4</sub>·7H<sub>2</sub>O) were obtained from Sinopharm Chemical Reagent Co., Ltd. Ethanol (CH<sub>3</sub>CH<sub>2</sub>OH), Hydrofluoric acid (HF), Hydrochloric acid (HCl), Sulfuric acid (H<sub>2</sub>SO<sub>4</sub>), Zinc sulfate heptahydrate (ZnSO<sub>4</sub>·7H<sub>2</sub>O) and Sodium hydroxide (NaOH) were purchased from Beijing Chemical Works. Ammonium hydroxide (NH<sub>3</sub>·H<sub>2</sub>O, Beijing Modern oriental Fine Chemistry Co., Ltd), 2-methylimidazole (2-Melm, 98%, Adamas Reagent Co., Ltd), Potassium hydroxide (KOH, Aladdin Reagent), nafion solution (5 wt%, Shanghai Hesen Electric Appliance Co., Ltd) and Pt catalysts (Pt/XC-72, 20 wt%, Alfa Aesar) were purchased.

**Preparation of SiO<sub>2</sub>.** SiO<sub>2</sub> was prepared using a modified stöber method. Typically, 11.2 mL of TEOS was added into 112 mL of ethanol/deionized solution, then adding 20 mL of NH<sub>3</sub>·H<sub>2</sub>O into above solution. Followed the above solution was stirred for 2 h. The SiO<sub>2</sub> were centrifuged, and washed with ethanol three times and dried at 60°C for 12 h.

**Preparation of SiO<sub>2</sub>@ZIFs-Co<sub>x</sub>Zn<sub>1-x</sub>.** a mol of CoSO<sub>4</sub>·7H<sub>2</sub>O and 12.3-a mol of ZnSO<sub>4</sub>·7H<sub>2</sub>O (a = 0, 0.65, 2.84, 9.23, 11.07, and 12.3 mol), and 8.22 g of 2-Melm were dissolved into 120 mL and 200 mL of methanol, respectively. Then, the 120 mL of mixed solution was immediately added into the 2-Melm solution. 10 mL of SiO<sub>2</sub> solution (1 mg·mL<sup>-1</sup>) was added into the above solution with magnetic stirring, and the mixtures were further stirring for 3 h. Finally, the purple solid product was collected by centrifugation and washed with methanol. After drying at 60°C for overnight, the as-prepared a series of core-shell SiO<sub>2</sub>@ZIF-Co<sub>x</sub>Zn<sub>1-x</sub> were obtained.

---

**Preparation of CNTs decorated on Co/N-Doped Hollow Carbon hybrids (CNTs-Co/NHC-x).** The as-prepared core-shell  $\text{SiO}_2@\text{ZIF-Co}_x\text{Zn}_{1-x}$  product was pyrolyzed at a definite temperature (900°C) for 3 h under Ar atmosphere (constant flow of 40 sccm). The obtained powder was processed in HF solution (5 wt%) and 2 M HCl solution for 12 h, respectively, and washed thoroughly with deionized ethanol and water. After drying at 80°C for 12 h, a series of CNTs decorated on Co/N-Doped Hollow Carbon (CNTs-Co/NHC-x) hybrids was obtained.

**Preparation of Co/N-Doped Hollow Carbon hybrids (Co/NHC).** In contrast, the both as-prepared core-shell  $\text{SiO}_2@\text{ZIF-Co}$  and  $\text{SiO}_2@\text{ZIF-Zn}$  product also was pyrolyzed under above same definite temperature (900°C) for 3 h under Ar atmosphere. Then, the obtained powder was processed in HF solution (5 wt%) and 2 M HCl solution for 12 h, respectively, and washed thoroughly with deionized ethanol and water. After drying at 80°C for 12 h, the Co/N-Doped Hollow Carbon hybrids (Co/NHC) and N-Doped Hollow Carbon hybrids (NHC) was obtained, respectively.

**Characterization.** SEM measurements were carried out on a HITACHI SU8010 scanning electron microscope. XRD measurements was carried out on a SHIMADZU XRD-7000 diffractometer. Raman spectrum analyses was recorded on an XploRA™ PLUS Raman spectrometer. Thermogravimetric (TGA) analysis was performed on a TA instruments Q500 (TA Instruments New Castle, DE) under  $\text{N}_2$ . FT-IR was performed with a SHIMADZU IR Prestige-21 FT-IR spectrometer. XPS were recorded on a Thermos ESCALAB 250. The nitrogen sorption isotherms were measured by using BelSorp-Mini II automatic volumetric adsorption equipment, and Barrett-Emmett-Teller (BET) surface area were calculated by using the Barrett-Joyner-Halenda (BJH) method. TEM and HRTEM were taken on a JEOL JEM-2100F field-emission high-resolution transmission electron microscope.

**Electrochemical Text.** All electrochemical measurements were performed on an electrochemical workstation (CHI 760D, Shanghai, China) in a conventional three-electrode electrochemical cell, with a electrocatalyst modified glass carbon electrode (GCE) (diameter, 3 mm) or rotating ring disk electrode (RRDE) (diameter, 4 mm) as working electrode, a platinum wire as the auxiliary electrode and a saturated Ag/AgCl (saturated with 3 M KCl) as reference electrode. The catalyst ink was prepared by

adding 2 mg of catalyst (or commercial Pt/C, 20 wt%) into 1 mL of mixed solution containing ethanol and 5.0 wt% Nafion at a volume ratio of 39:1 under ultrasonic agitation to form a homogeneous catalyst suspension (2 mg·mL<sup>-1</sup>). Then, a calculated amount (6.3 µL) of commercial Pt/C catalyst ink was evenly cast on the surface of pre-cleaned RRDE, and dried at room temperature, corresponding to 0.1 mg·cm<sup>-2</sup> of commercial Pt/C. Likewise, the non-precious metal catalyst modified pre-cleaned GCE or RRDE surface also obtained, and the loadings were 0.2 mg·cm<sup>-2</sup>. Before test, an Ar or O<sub>2</sub> flow was used for the electrolyte in cell for 30 min to give a saturation state. CV curves were recorded in Ar- or O<sub>2</sub>-saturated 0.1 M KOH solution with a scan rate of 20 mV·s<sup>-1</sup>. LSV curves were recorded in O<sub>2</sub>-saturated 0.1 M KOH solution containing 0.2 M KCl at different speed rates (400, 625, 900, 1225 and 1600 rpm) with a scan rate of 20 mV·s<sup>-1</sup>. The disk potential was cycled from -1.0 to 0.2 V (vs. Ag/AgCl) at a scan rate of 20 mV·s<sup>-1</sup>. A flow of O<sub>2</sub> was maintained over the electrolyte during the LSV test to ensure O<sub>2</sub> saturation. All the current density in this work was calculated based on the geometrical area of glass carbon electrode or rotating disk electrode.

We calculated the number of electron transfer (*n*) and the H<sub>2</sub>O<sub>2</sub> percent yield (wt%) involved in ORR using the following equations:

$$n = \frac{4I_d}{\left(I_d + \frac{I_r}{N}\right)}$$

$$H_2O_2 (\%) = \frac{200I_r}{N \times I_d + I_r}$$

Where *I<sub>d</sub>* and *I<sub>r</sub>* are the disk current and the ring current, respectively, and *N* is the current collection efficiency of Pt ring and was determined to be 0.42.

For investigation of the possible reasons for the excellent ORR activity of CNTs-Co/NHC-x catalyst, it is necessary to explore the electrocatalytic mechanisms and the reaction kinetics of CNTs-Co/NHC-x catalyst toward ORR. The ORR performance of CNTs-Co/NHC-x catalyst in the kinetic-limiting and diffusion-limiting region can be investigated using the Koutecky-Levich (K-L) equations:

$$\frac{1}{J} = \frac{1}{J_L} + \frac{1}{J_K} = \frac{1}{B\omega^{\frac{1}{2}}} + \frac{1}{J_K}$$

$$B = 0.62nFC_0(D_0)^{\frac{2}{3}}\nu^{-\frac{1}{6}}$$

---

Where  $J$  is the measured current density,  $J_k$  and  $J_L$  are the kinetic-limiting and diffusion-limiting current densities,  $\omega$  is the angular frequency of the rotation in terms of  $\text{rad}\cdot\text{s}^{-1}$ ,  $n$  is transferred electron number during ORR,  $F$  is the Faraday constant ( $96485\text{ C}\cdot\text{mol}^{-1}$ ),  $C_0$  is the bulk concentration of oxygen ( $1.2\times 10^{-6}\text{ mol}\cdot\text{cm}^{-3}$  for  $0.1\text{ M KOH}$ ),  $D_0$  is the diffusion coefficient of oxygen in the electrolyte, and  $\nu$  is the kinematic viscosity of the electrolyte.

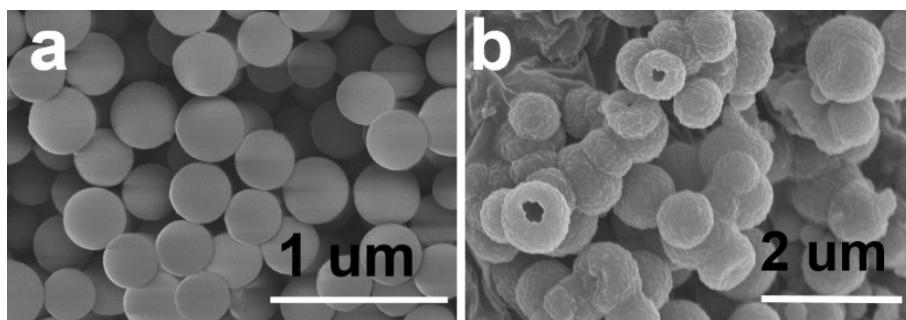

**Fig. S1** SEM image of (a)  $\text{SiO}_2$  and (b) core-shell  $\text{SiO}_2$ @ZIFs-Co precursor (Namely,  $x = 1$  in the  $\text{SiO}_2$ @ZIFs- $\text{Co}_x\text{Zn}_{1-x}$  precursor).

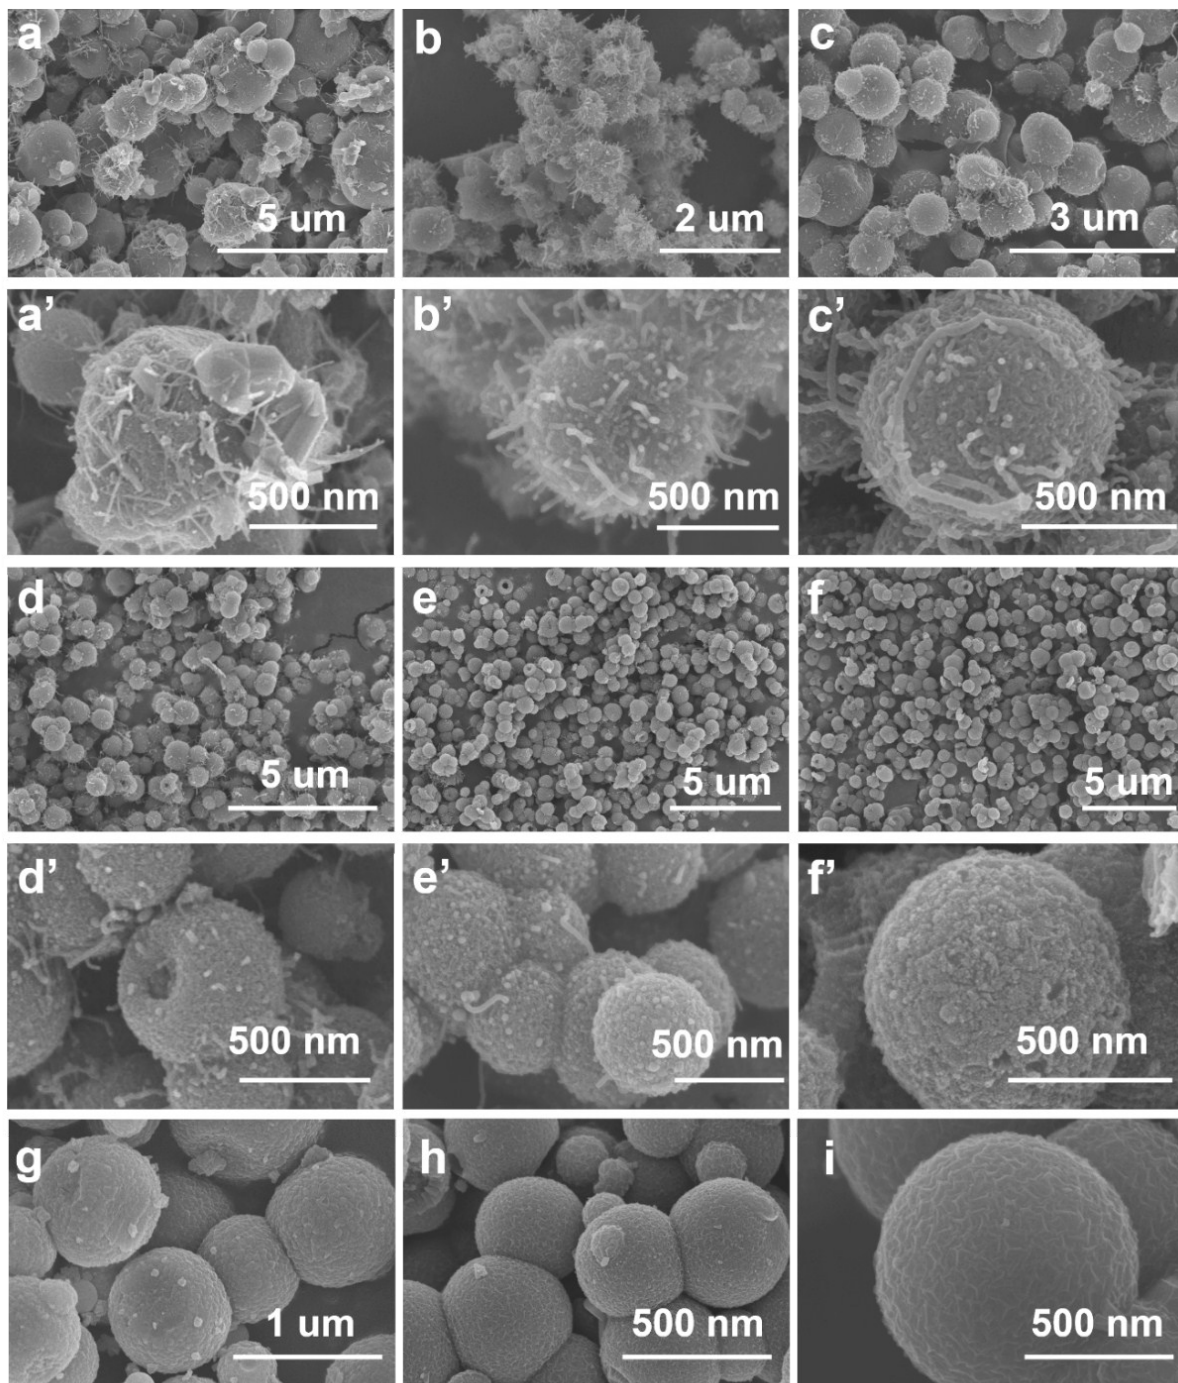

**Fig. S2** SEM image of different content CNTs structure anchored on Co/NHC hybrids derived from  $\text{SiO}_2@\text{ZIFs-Co}_x\text{Zn}_{1-x}$  precursor [ $x = 0.09$  (a, a'), 0.23 (b, b'), 0.5 (c, c'), 0.75 (d, d'), 0.90 (e, e') and 1 (f, f')]. SEM image of  $\text{SiO}_2@\text{ZIF-Co}_0\text{Zn}_1$  (g) its pyrolysis product (h, i) without CNTs on the carbon surface.

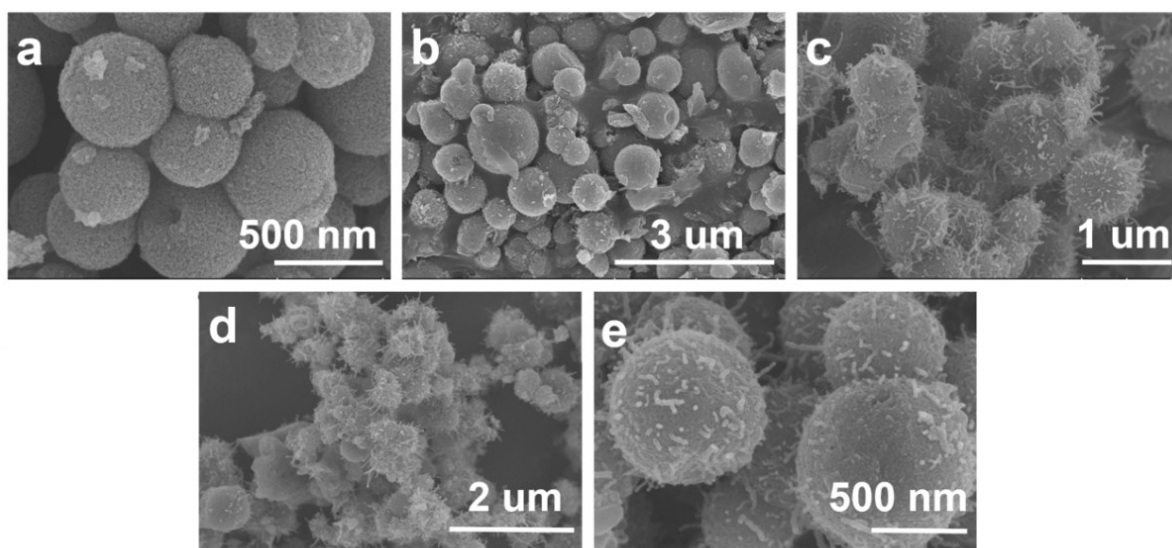

**Fig. S3** SEM image of different content CNTs structure anchored on Co/NHC hybrids derived from SiO<sub>2</sub>@ZIFs-Co<sub>0.23</sub>Zn<sub>0.77</sub> precursor at different temperature [600 °C (a), 700 °C (b), 800 °C (c), 900 °C (d), 1000 °C (e)].

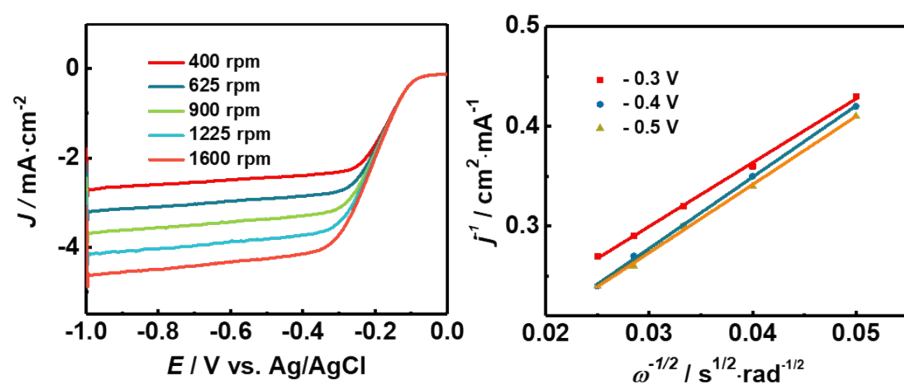

**Figure S4.** (a) RDE voltammograms of electrode modified with Co/NHC at different rotation rates from 400 to 1600 rpm. (b) the corresponding Koutecky-Levich plots for the Co/NHC electrocatalysts at -0.3 ~ -0.5 V (vs. Ag/AgCl).



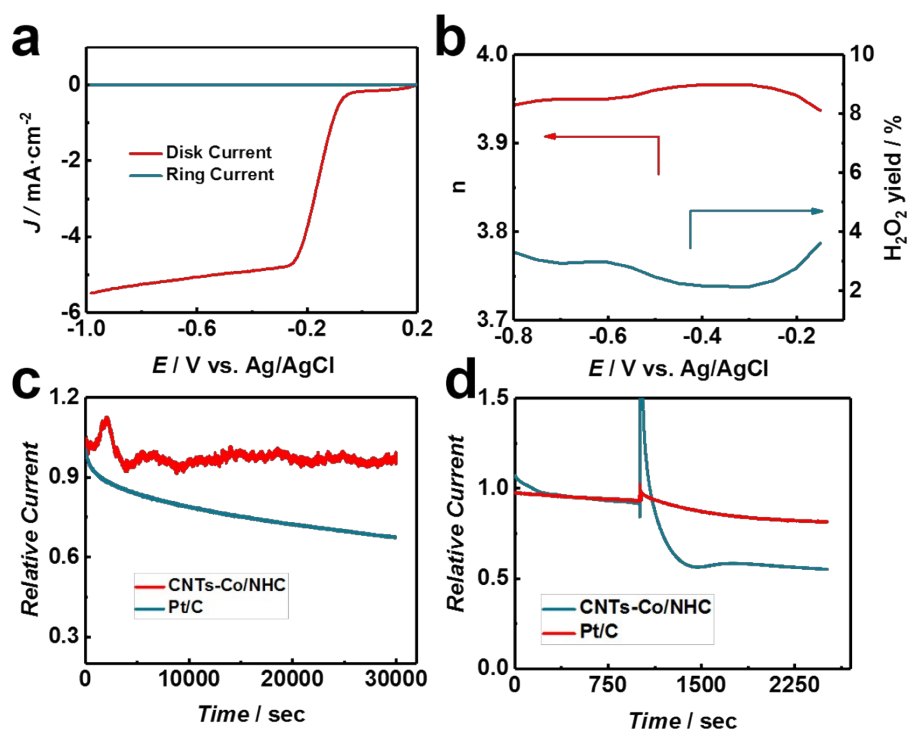

**Fig. S5** (a) RRDE of modified electrode with CNTs-Co/NHC-0.23 in  $O_2$ -saturated 0.1 M KOH solution at a rotational speed of 1600 rpm. (b) the electron transferred number ( $n$ ) and  $H_2O_2$  yield during ORR calculated from RRDE. (c) Chronoamperometry test in  $O_2$ -saturated 0.1M KOH solution at -0.3 V (vs. Ag/AgCl) on electrode modified with CNTs-Co/NHC-0.23 and Pt/C for 30000 s. (f) Chronoamperometric responses on electrode modified with CNTs-Co/NHC-0.23 and Pt/C on addition of 2.0 M methanol after about 1000 s.

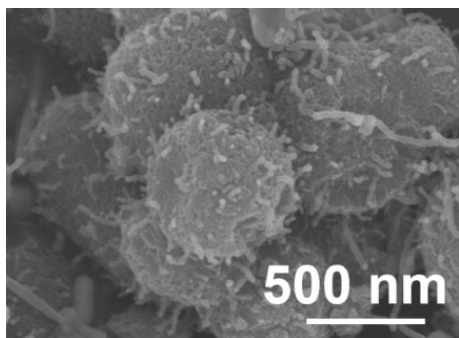

**Fig. S6** SEM images of CNTs-Co/NHC after electrochemical test.

**Table S1.** Comparison of the catalytic activity of nitrogen-doped carbon for ORR.

| Sample           | $E_{\text{onset}}$ (V vs. RHE) | $E_{1/2}$ (V vs. RHE) | n       | Ref.     |
|------------------|--------------------------------|-----------------------|---------|----------|
| Co@N-CNTs-m      | 0.929                          | 0.849                 | 3.5~3.8 | S1       |
| Co-MOF@CNTs      | 0.91                           | 0.82                  | 3.7     | S2       |
| Co-C@NWCs        | 0.939                          | 0.83                  | 3.99    | S3       |
| NCNCs            | -0.15                          | -0.26                 | 3.27    | S4       |
| NT-G             | 0.89                           | 0.76                  | —       | S5       |
| NOMGAs           | -0.15 (vs. Ag/AgCl)            | -0.28 (vs. Ag/AgCl)   | 3.9     | S6       |
| NDMC             | -0.02                          | -0.13                 | 3.2     | S7       |
| CoO@N/S-CNF      | 0.84                           | 0.722                 | 4.00    | S8       |
| MnCoO-NCNTs      | —                              | —                     | 3.8     | S9       |
| CNT/HDC          | 0.92                           | 0.82                  | —       | S10      |
| CNTs-Co/NHC-0.23 | -0.03 V (vs. Ag/AgCl)          | -0.15 V (vs. Ag/AgCl) | 3.96    | Our work |
|                  | 0.95 V                         | 0.84 V                |         |          |

note#

**Co@N-CNTs-m:** Cobalt nanoparticle-encapsulated nitrogen-doped carbon nanotubes.**Co-C@NWCs:** nitrogen-enriched core-shell structured cobalt-carbon nanoparticles sequentially aligned on wrinkles of nitrogen-doped carbon nanosheets.**NCNCs:** Nitrogen-doped carbon nanocages.**NT-G:** few-walled (two to three walls) carbon nanotube-graphene hybrid.**NOMGAs:** nitrogen-doped ordered mesoporous graphitic arrays.**NDMC:** Nitrogen-doped mesoporous carbon.**CoO@N/S-CNF:** CoO embedding nanoparticles into nitrogen and sulfur co-doped carbon nanofiber networks.**MnCoO-NCNTs:** spinel Mn-Co oxide nanoparticles partially embedded in N-doped carbon nanotubes.**CNT/HDC:** carbon nanotubes/heteroatom-doped carbon.

---

### Supplementary references

- (1) S. L. Zhang, Y. Zhang, W. J. Jiang, X. Liu, S. L. Xu, R. J. Huo, F. Z. Zhang, J. S. Hu, *Carbon* 2016, 107, 162-170.
- (2) Y. Fang, X. Li, F. Li, X. Lin, M. Tian, X. Long, X. An, Y. Fu, J. Jin, J. Ma, *J. Power Sources* 2016, 326, 50-59.
- (3) Y. Li, F. Cheng, J. Zhang, Z. Chen, Q. Xu, S. Guo, *Small* 2016, 12, 2839-2845.
- (4) S. Chen, J. Bi, Y. Zhao, L. Yang, C. Zhang, Y. Ma, Q. Wu, X. Wang, Z. Hu, *Adv. Mater.* 2012, 24, 5593.
- (5) Y. Li, W. Zhou, H. Wang, L. Xie, Y. Liang, F. Wei, J. C. Idrobo, S. J. Pennycook, H. Dai, *Nature Nanotechnology*, 2012, 7, 394-400.
- (6) R. Liu, D. Wu, X. Feng, K. Müllen, *Angew. Chem. Int. Ed.* 2010, 49, 2565.
- (7) W. Yang, T. P. Feller, M. J. Antonietti, *J. Am. Chem. Soc.* 2011, 133, 206.
- (8) T. Liu, Y. F. Guo, Y. M. Yan, F. Wang, C. Deng, D. Rooney, K. N. Sun, *Carbon* 2016, 106, 84-92.
- (9) A. Zhao, J. Masa, W. Xia, A. Maljusch, M. G. Willinger, G. Clavel, K. Xie, R. Schlogl, W. Schuhmann, M. Muhler, *J. Am. Chem. Soc.* 2014, 136, 7551-7554.
- (10) Y. J. Sa, C. Park, H. Y. Jeong, S. H. Park, Z. Lee, K. T. Kim, G. G. Park, S. H. Joo, *Angew. Chem. Int. Ed.* 2014, 53, 4102.
